# Supplementary material for: Generation of rabbit polyclonal human and murine collagen VII monospecific antibodies: A useful tool for dystrophic epidermolysis bullosa therapy studies
Source: PubMed Central journal article supplement — Matrix Biol Plus. 2019 Nov 20;4:100017. doi: 10.1016/j.mbplus.2019.100017 (PMC7852329; doi:10.1016/j.mbplus.2019.100017), 2019-11-20
Supplement: mmc1.pdf [file mmc1.pdf]

**Supplementary material**

**Generation of rabbit polyclonal human and murine collagen VII monospecific antibodies: A useful tool for dystrophic epidermolysis bullosa therapy studies**

Olivier Bornert<sup>1</sup>, Thomas Kocher<sup>2</sup>, Christine Gretzmeier<sup>1</sup>, Bernadette Liemberger<sup>2</sup>,  
Stefan Hainzl<sup>2</sup>, Ulrich Koller<sup>2</sup>, Alexander Nyström<sup>1\*</sup>

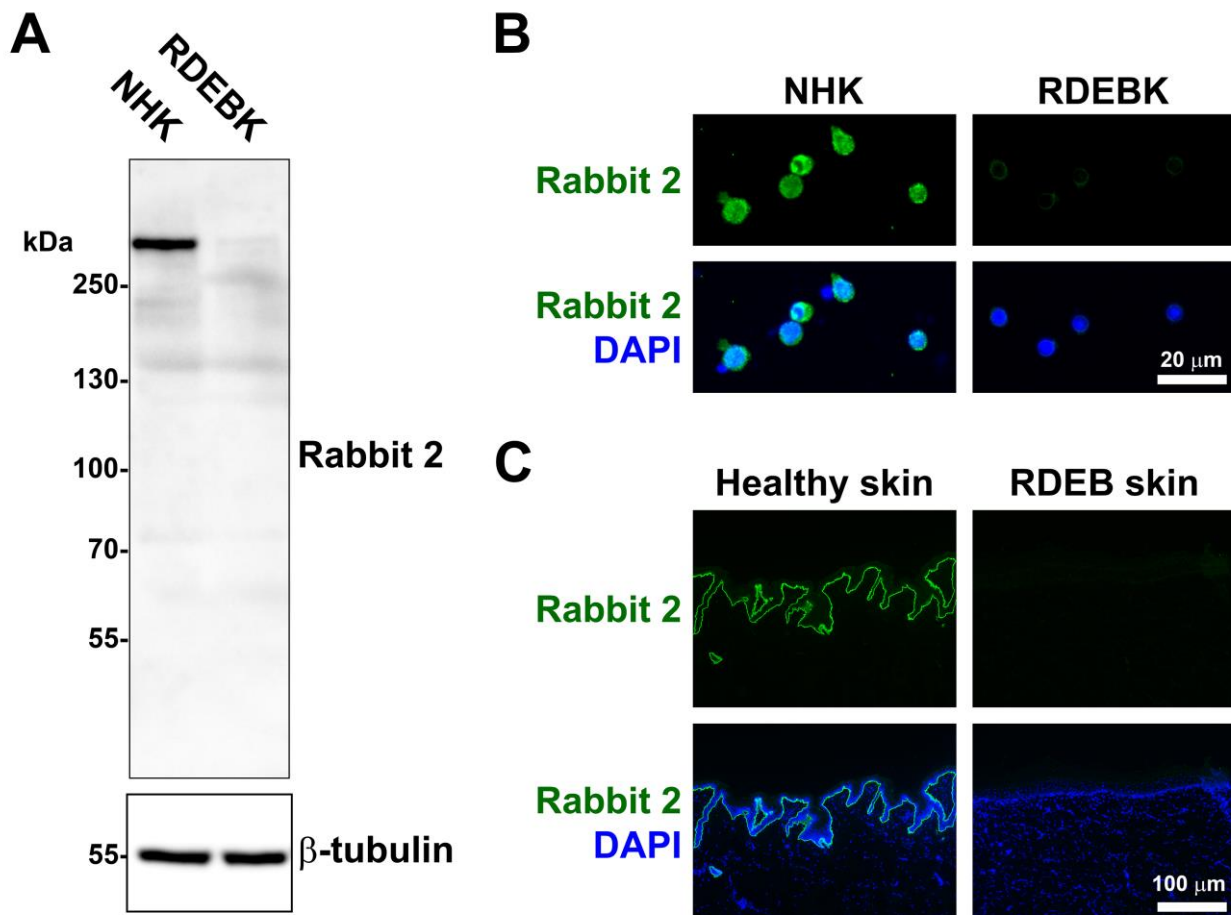

**Supplemental Fig. 1. Antiserum from rabbit 2 immunized with hLH 7:2 specifically recognizes collagen VII.** **A**, Western blots of protein lysates from normal human keratinocytes or keratinocytes from donors with complete collagen VII deficient RDEB probed with rabbit 2 serum or  $\beta$ -tubulin used to ensure equal loading. **B**, Staining of keratinocytes as in A with rabbit 2 serum. Nuclei counterstained with DAPI, scale bar = 20  $\mu$ m. **C**, Staining of human skin cryosections from healthy donors or donors with complete collagen VII deficient RDEB with rabbit 2 serum. Nuclei counterstained with DAPI, scale bar = 100  $\mu$ m.

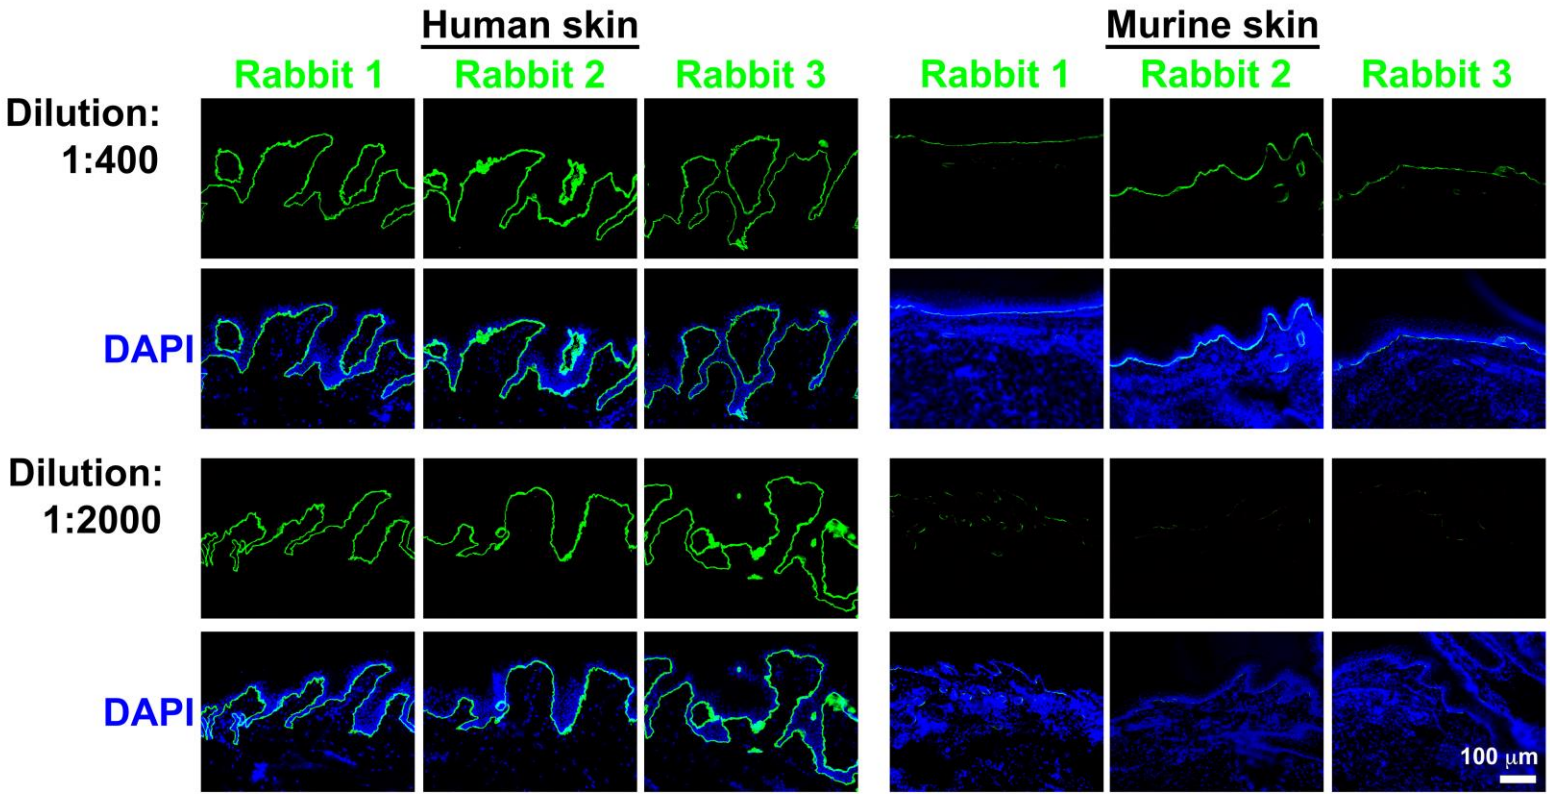

**Supplemental Fig. 2. Sera from rabbits immunized with the hLH 7:2 strongly recognize human but minimally murine collagen VII at higher dilutions.** Human and murine wild-type skin cryosections stained with sera from rabbits 1 – 3 immunized with the hLH 7:2 peptide at 1:400 or 1:2000 dilutions. Nuclei counterstained with DAPI, scale bar = 100  $\mu\text{m}$ .

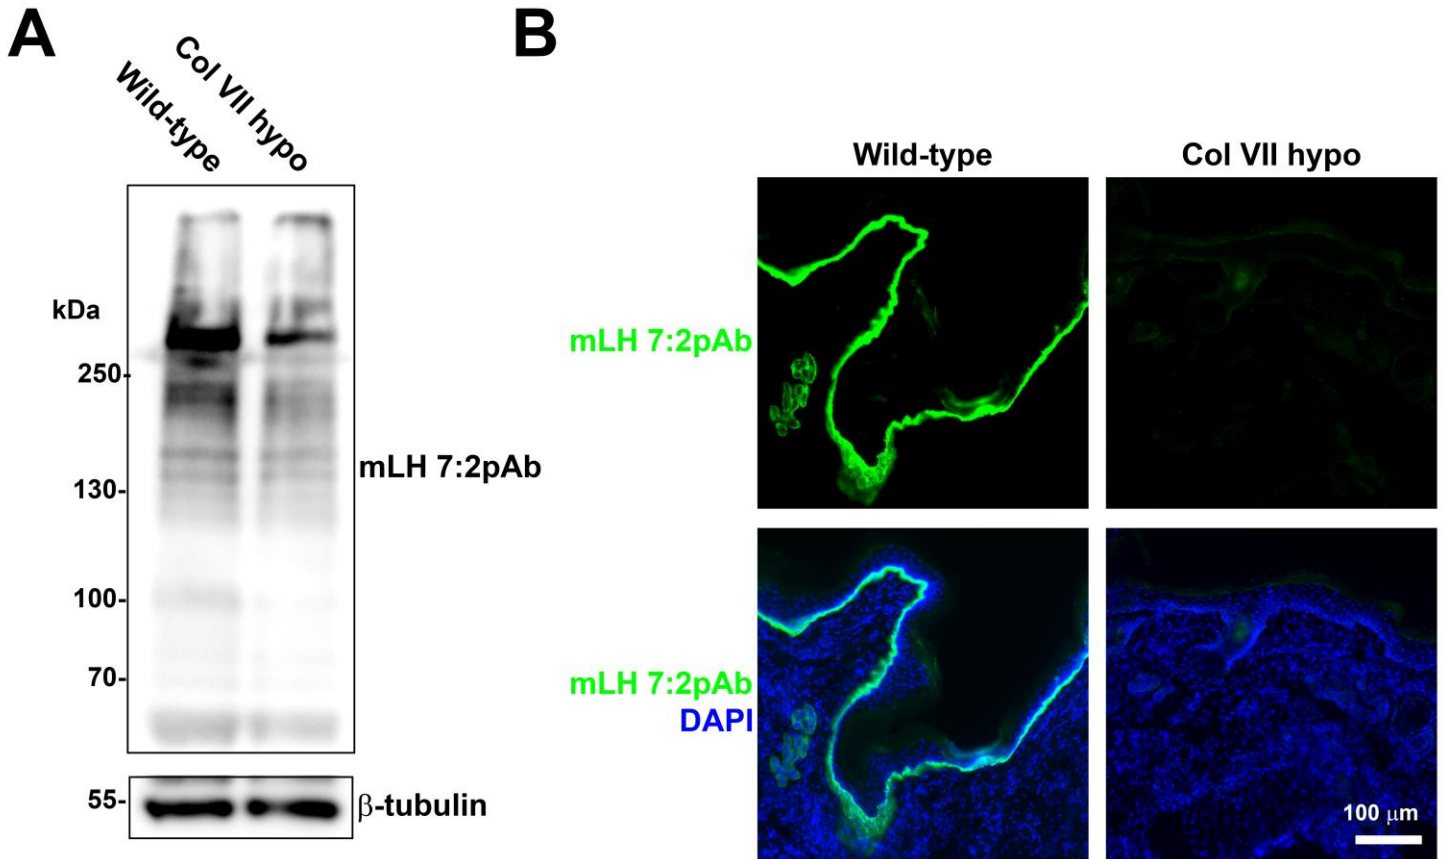

**Supplemental Fig. 3. mLH 7:2pAb specifically recognizes collagen VII. A,** Western blot of skin lysates from wild-type and collagen VII hypomorphic mice probed with mLH 7:2pAb or  $\beta$ -tubulin used to ensure equal loading. **B,** Skin cryosections from mice as in A stained with mLH 7:2pAb (green). Nuclei counterstained with 4',6-diamidino-2-phenylindole (DAPI), scale bar = 100  $\mu$ m.

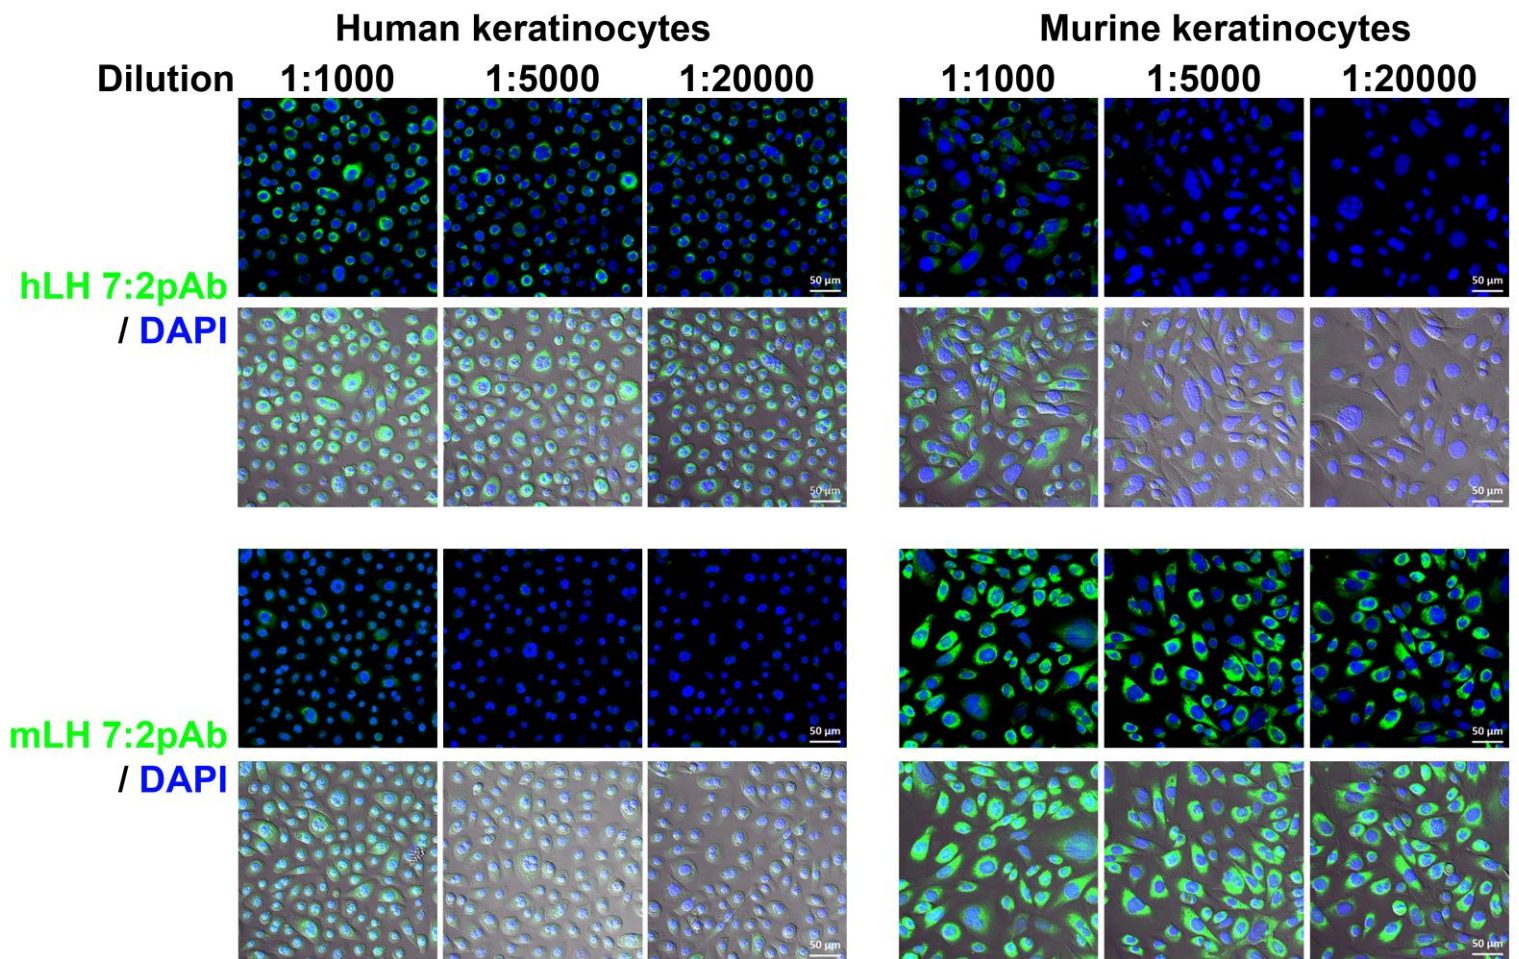

**Supplemental Fig. 4 mLH 7:2pAb strongly recognizes murine but minimally human collagen VII at higher dilutions.** Human or murine wild-type keratinocytes stained with hLH 7:2pAb and mLH 7:2pAb at the indicated dilutions. Nuclei counterstained with DAPI, scale bar = 50  $\mu$ m.



**A**

|                       |                                                                                                 |              |                    |     |
|-----------------------|-------------------------------------------------------------------------------------------------|--------------|--------------------|-----|
| <b>Murine LH 7:2</b>  | LSLQNI TSHSLLVAVRRVPGANGYRVTWRDLS                                                               | GGPTQQQDLSP  | GGGSVFLDHLPEPGTDYE | 60  |
| <b>Rat LH7:2</b>      | LSVQNI TSHSLLVAVRRVPGANGYRVTWRDLS                                                               | GGGAQQQDLSP  | GGGSVFLDHLKPGTDYE  | 60  |
| <b>Ovine LH 7:2</b>   | VTIQNTTAHSLLVAVRWSVPGATGYRVTWRVVR                                                               | GGATQQQELGPG | GGGSVLLRDLQPGTDYE  | 60  |
| <b>Porcine LH 7:2</b> | LTIQNSTAHSLFLVAVQSVPGATGYRVTWRVLS                                                               | GGAMQQQELGPG | GGGSVLLHDLPEPGTDYE | 60  |
| <b>Human LH 7:2</b>   | LTIQNNTAHSLLVAVRWSVPGATGYRVTWRVLS                                                               | GGPTQQQELGPG | GGGSVLLRDLPEPGTDYE | 60  |
| <b>Canine LH 7:2</b>  | LTIQNTTTHSLLVAVRWSVPGATGYRVTWRVLS                                                               | GGVTQQQELGPG | GGGSVLLRDLPEG-DYE  | 59  |
|                       | * * * * * * * * * * * * * * * * * * * * * * * * * * * * * * * * * * * * * * * * * * * * * * * * |              |                    |     |
| <b>Murine LH 7:2</b>  | VTVSALFGHSVGAASLTARTASSVEQTLHPILSPTSILLSWNLVPEARGYRLEWRRES                                      |              |                    | 120 |
| <b>Rat LH7:2</b>      | VTVSALFGRSVGAASLTTRTASSVEQTLRPIILSPTSILLSWNLVPEARGYRLEWHRES                                     |              |                    | 120 |
| <b>Ovine LH 7:2</b>   | VTVSALLGRSVGPATSLTARTDTSVEQTLRPVILGPTSILLSWNLVPEARGYRLEWRRES                                    |              |                    | 120 |
| <b>Porcine LH 7:2</b> | VTVSALFGRNLGPATSLTARTDISVEQTLRPLILGPTSILLSWNLVPEARGYRLEWRRES                                    |              |                    | 120 |
| <b>Human LH 7:2</b>   | VTVSTLFGRSVGPATSLMARTDASVEQTLRPVILGPTSILLSWNLVPEARGYRLEWRRET                                    |              |                    | 120 |
| <b>Canine LH 7:2</b>  | VTVSSLLGRSIGSASSLTARTDTSVEQTLRPVILGPTSILVSWNLVPEARGYRLEWRRES                                    |              |                    | 119 |
|                       | * * * * * * * * * * * * * * * * * * * * * * * * * * * * * * * * * * * * * * * * * * * * * * * * |              |                    |     |
| <b>Murine LH 7:2</b>  | GLETPQKVELPPDVTRHQLDGLQPGTEYRLTYLLEGREVATPATVVPTGLE--QLVSP                                      |              |                    | 178 |
| <b>Rat LH7:2</b>      | GLEPPQKVELLPDVTRYQLDGLQPGTEYRLTYLLEGREVATPATVVPTGLE--QLVGP                                      |              |                    | 178 |
| <b>Ovine LH 7:2</b>   | GLEVPQKVVLPSDVTRYQLDGLQPGTEYRLTYLLEGREVATPATVVPTGEGPRGPEGP                                      |              |                    | 180 |
| <b>Porcine LH 7:2</b> | GLEVPQKVVLPSDVTHYQLDGLQPGTEYRLTYLLEGREVATPATVVPTG--PELPVGP                                      |              |                    | 178 |
| <b>Human LH 7:2</b>   | GLEPPQKVVLPSDVTRYQLDGLQPGTEYRLTYLLEGREVATPATVVPTG--PELPVSP                                      |              |                    | 178 |
| <b>Canine LH 7:2</b>  | GLGVPQKVVLPSDVTRYQLDGLQPGTEYRLTYLLEGREVATPATVVPTG--PELPVGP                                      |              |                    | 177 |
|                       | * * * * * * * * * * * * * * * * * * * * * * * * * * * * * * * * * * * * * * * * * * * * * * * * |              |                    |     |
| <b>Murine LH 7:2</b>  | VMNLQAIELPGQRRVRSWNPVPGATEYRFTVRTTQGVERTLLLPGSQTTFFLDDVVRAGLS                                   |              |                    | 238 |
| <b>Rat LH7:2</b>      | VMNLQATELPGQRLRVSWNPVLGATEYRFTVRTPQGVERTLLLPGSQTTFFLDDVVRAGIS                                   |              |                    | 238 |
| <b>Ovine LH 7:2</b>   | VTALQATELPGQRRVRSWSPVPSATEYRITVRSAQGVERSLVLPGSQTAFDLDDVVRAGLS                                   |              |                    | 240 |
| <b>Porcine LH 7:2</b> | VMDLQATELPGQRRVRSWSPVPSATEYRITMRSTQGVERTLVLPGSQTAFDLDDVVRAGLS                                   |              |                    | 238 |
| <b>Human LH 7:2</b>   | VTDLQATELPGQRRVRSWSPVPGATQYRIIVRSTQGVERTLVLPGSQTAFDLDDVQAGLS                                    |              |                    | 238 |
| <b>Canine LH 7:2</b>  | VTDLQATELPGQRRVRSWSPVPGATEYRITVRSAQGVERTLVLPGSQTAFDLDDVVRAGLS                                   |              |                    | 237 |
|                       | * * * * * * * * * * * * * * * * * * * * * * * * * * * * * * * * * * * * * * * * * * * * * * * * |              |                    |     |
| <b>Murine LH 7:2</b>  | YTVRV SAR                                                                                       | 246          |                    |     |
| <b>Rat LH7:2</b>      | YTVRV SAR                                                                                       | 246          |                    |     |
| <b>Ovine LH 7:2</b>   | YTVRV SAR                                                                                       | 248          |                    |     |
| <b>Porcine LH 7:2</b> | YTVRV SAR                                                                                       | 246          |                    |     |
| <b>Human LH 7:2</b>   | YTVRV SAR                                                                                       | 246          |                    |     |
| <b>Canine LH 7:2</b>  | YTVRV SAR                                                                                       | 245          |                    |     |
|                       | *****                                                                                           |              |                    |     |

**B**

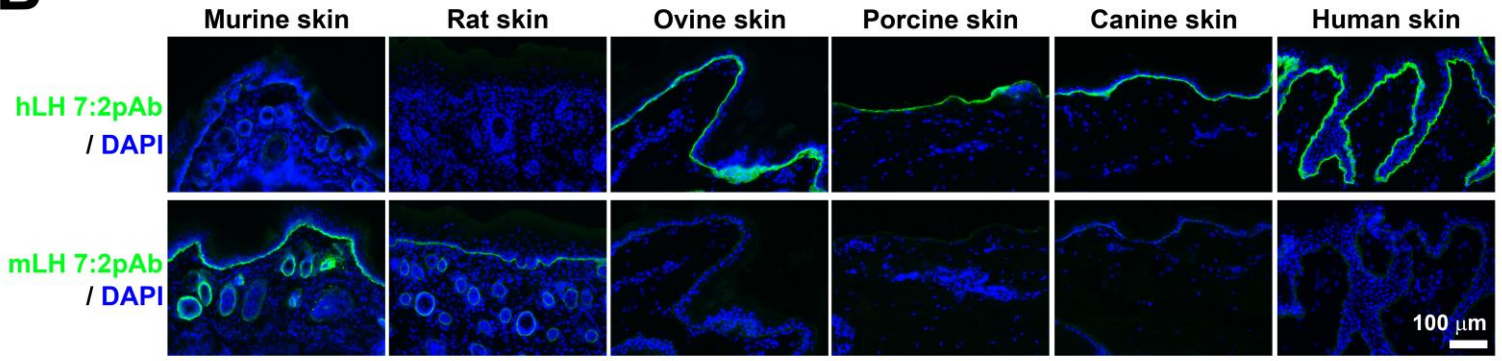

**C**

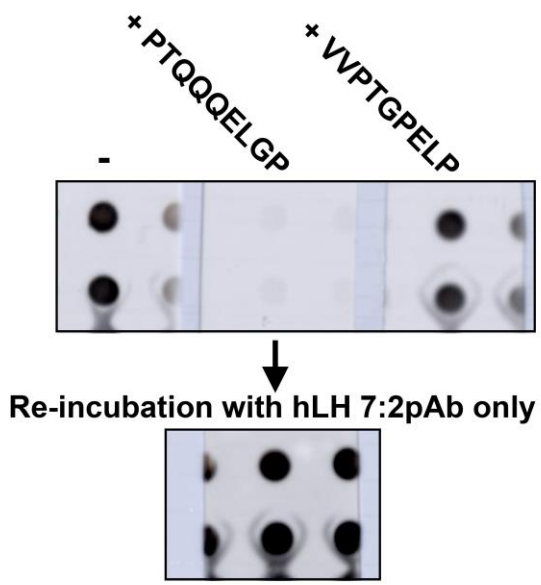

**Supplemental Fig. 5 Species specificity of mLH 7:2pAb and hLH 7:2pAb and identification of one epitope predominantly recognized by hLH 7:2pAb. A,** Alignment of murine, rat, ovine, porcine, canine and human LH 7:2 peptides. Amino acids in the predicted N-terminal predominant immunoeptope shared by all species are marked in yellow, amino acids common for rat and mouse in red and amino acids shared by sheep, pig, dog and human in blue. **B,** Staining of skin from species as indicated with mLH 7:2pAb (green) and hLH 7:2pAb at 1:2000 dilution (green). Nuclei counterstained with DAPI (blue), scale bar = 100  $\mu$ m. **C,** Peptide competition binding assay. hLH 7:2pAb incubated with or without the indicated peptides (0.1 mg/ml) and then incubated with membranes on which 100 ng recombinant human collagen VII had been immobilized. The results show that the PTQQQELGP peptide blocks binding of the antisera to human collagen VII. The almost complete absence of signal is not due to insufficient amounts of collagen VII on the membrane as re-incubation with hLH 7:2pAb only results in a strong signal.
